# Supplementary material for: The Immune Atlas of Human Deciduas With Unexplained Recurrent Pregnancy Loss
Source: Front Immunol. 2021 Jun 7;12:689019. doi: 10.3389/fimmu.2021.689019 (PMC8218877; doi:10.3389/fimmu.2021.689019)
Supplement: Supplementary file 12 [file Table_7.xlsx]

## Sheet: Figures 5D, 5E, 5F
Table S7-1. List of Selected Signature Genes Expressed in Monocytes and Macrophage Cell Clusters, Related to Figures 5D, 5E, 5F
Ensembl ID	Gene Symbol	Cluster 1 (Average Expression)	Cluster 1 (Log2 Fold Change)	Cluster 1 P-Value	Cluster 2 (Average Expression)	Cluster 2 (Log2 Fold Change)	Cluster 2 P-Value	Cluster 3 (Average Expression)	Cluster 3 (Log2 Fold Change)	Cluster 3 P-Value	Cluster 4 (Average Expression)	Cluster 4 (Log2 Fold Change)	Cluster 4 P-Value	Cluster 5 (Average Expression)	Cluster 5 (Log2 Fold Change)	Cluster 5 P-Value	Cluster 6 (Average Expression)	Cluster 6 (Log2 Fold Change)	Cluster 6 P-Value	Cluster 7 (Average Expression)	Cluster 7 (Log2 Fold Change)	Cluster 7 P-Value	Cluster 8 (Average Expression)	Cluster 8 (Log2 Fold Change)	Cluster 8 P-Value	Cluster 9 (Average Expression)	Cluster 9 (Log2 Fold Change)	Cluster 9 P-Value	Cluster 10 (Average Expression)	Cluster 10 (Log2 Fold Change)	Cluster 10 P-Value
Classical Monocyte-associated Gene in Cluster 3 Monocytes (Figure 5D)
ENSG00000085265	FCN1	0.0570238	-3.17372	4.27212e-06	0.0906313	-2.58099	4.19778e-07	2.51803	4.02863	1.9075e-46	0.0795747	-2.75696	3.80596e-07	0.0402519	-3.58432	0.000641495	0.366879	-0.426121	0.894623	0.118199	-1.92219	1	0.20335	-1.2812	0.387108	0.248912	-0.975155	0.664211	0.00939294	-4.69795	1
ENSG00000125538	IL1B	9.74157	-0.367002	0.846773	4.22722	-1.70578	5.61268e-05	23.4931	1.16542	0.000843644	20.7274	0.954596	0.0451506	6.24851	-1.0285	0.540667	11.169	-0.154765	1	14.6173	0.250216	1	7.4846	-0.760294	0.757572	10.8582	-0.187389	1	4.11411	-1.59997	1
ENSG00000102265	TIMP1	1.81051	-1.51529	0.0304423	1.05848	-2.3801	3.66956e-07	23.52	3.6624	4.08113e-40	1.48579	-1.85771	0.000437296	1.40645	-1.85002	0.150889	3.52112	-0.513504	0.71517	1.50704	-1.69014	1	1.82797	-1.46862	0.164407	1.43946	-1.81653	0.0432174	2.06645	-1.23453	1
ENSG00000124731	TREM1	0.231263	-1.09181	0.208185	0.174549	-1.57176	0.00169832	1.43945	2.20188	1.17729e-13	0.403812	-0.235461	1	0.146801	-1.72411	0.154105	0.573393	0.367489	0.736696	0.236398	-0.944963	1	0.201164	-1.26935	0.251141	0.234823	-1.03393	0.527564	0.629327	0.454171	1
Neutrophil-associated Genes in Cluster 3 Monocytes (Figure 5E)
ENSG00000143546	S100A8	0.55915	-2.04392	0.00805188	0.226019	-3.44637	3.1125e-10	10.122	3.56538	8.15353e-32	0.236349	-3.36612	8.86555e-09	0.589572	-1.91948	0.213284	2.44471	0.257105	0.990114	0.541745	-1.96802	1	0.616611	-1.86099	0.0709748	1.31031	-0.731566	0.94908	0.347539	-2.5989	1
ENSG00000163220	S100A9	0.972573	-2.05324	0.00204019	0.819039	-2.37221	9.23972e-07	13.7347	2.69898	1.26211e-19	0.629471	-2.75006	1.37545e-07	1.70005	-1.1806	0.632014	5.84007	0.830751	0.139977	1.81238	-1.04361	1	1.06267	-1.88431	0.025456	3.66089	-0.0124782	1	1.36198	-1.45718	1
ENSG00000038427	VCAN	0.0601918	-2.16478	0.00719381	0.0391617	-2.86437	6.65291e-07	1.34116	4.04372	4.08113e-40	0.0308797	-3.1869	3.62127e-07	0.0165743	-3.84352	0.00215936	0.20536	-0.335991	1	0.0295497	-2.7133	1	0.0743431	-1.81021	0.110636	0.117411	-1.13817	0.630567	0.131501	-0.864063	1
ENSG00000124882	EREG	0.10296	-2.68324	5.74007e-05	0.0626587	-3.47962	1.96413e-11	3.07819	3.81577	1.00446e-41	0.383621	-0.747547	0.788065	0.0307808	-4.30356	2.23895e-05	0.417642	-0.61423	0.648188	0.167448	-1.80484	1	0.188044	-1.76039	0.0595313	0.157331	-2.01264	0.0238762	0.441468	-0.445859	1
Signature Genes of Macrophage (Figure 5F)
ENSG00000129226	CD68	2.7213	-0.21317	1	3.73043	0.322926	0.871455	2.18813	-0.569548	0.444371	2.90507	-0.112247	1	2.93128	-0.0905191	1	4.53292	0.676407	0.218165	4.42261	0.512379	1	1.84546	-0.80281	0.757572	2.26369	-0.488827	0.953403	4.55557	0.557342	1
ENSG00000177575	CD163	1.61884	0.715517	0.291662	1.16702	0.170278	1	0.526498	-1.11437	0.0337425	0.884823	-0.299965	1	1.79239	0.84483	0.416588	1.17563	0.182055	1	0.423546	-1.31807	1	0.795909	-0.44212	1	0.875889	-0.29292	1	0.488433	-1.11653	1
ENSG00000260314	CD206	1.3258	1.27194	0.00223165	0.598614	-0.108435	1	0.300279	-1.19783	0.0225612	0.551084	-0.245419	1	1.2407	1.07678	0.16502	0.484557	-0.459098	0.738033	0.295497	-1.09208	1	0.531335	-0.283253	1	0.326404	-1.01833	0.491835	0.826578	0.38454	1
ENSG00000159189	C1QC	17.416	0.0450381	1	26.4688	0.81167	0.0753083	3.66394	-2.37543	1.45163e-08	20.0493	0.292343	1	19.9578	0.25673	1	17.3783	0.0443321	1	18.9512	0.153436	1	11.2367	-0.636746	0.889433	17.4239	0.0427608	1	6.36841	-1.43877	1

## Sheet: Figure 5G
Table S7-2. List of Marker Genes of M1 and M2 Macrophages, Related to Figure 5G
Ensembl ID	Gene Symbol	Cluster 1 (Average Expression)	Cluster 2 (Average Expression)	Cluster 3 (Average Expression)	Cluster 4 (Average Expression)	Cluster 5 (Average Expression)	Cluster 6 (Average Expression)	Cluster 7 (Average Expression)	Cluster 8 (Average Expression)	Cluster 9 (Average Expression)	Cluster 10 (Average Expression)
M2 Markers
ENSG00000125538	IL1B	9.74157	4.22722	23.4931	20.7274	6.24851	11.169	14.6173	7.4846	10.8582	4.11411
ENSG00000204472	AIF1	4.94048	8.78788	6.76233	6.55601	8.89093	6.74342	10.766	4.4912	7.70454	4.23621
ENSG00000166927	MS4A7	4.89138	4.23394	1.32365	3.9051	3.78131	2.02245	3.08302	2.43364	2.19794	1.66255
ENSG00000110077	MS4A6A	3.94573	5.89887	2.43724	4.7246	4.85627	3.2973	4.9939	2.79661	3.47303	2.49852
ENSG00000129226	CD68	2.7213	3.73043	2.18813	2.90507	2.93128	4.53292	4.42261	1.84546	2.26369	4.55557
ENSG00000100979	PLTP	2.0386	2.41572	0.181783	1.02022	2.22096	1.20101	1.31004	0.994886	0.958077	0.300574
ENSG00000095970	TREM2	1.78991	2.4918	0.622102	2.05588	2.01733	2.22089	2.04878	1.3338	1.99365	1.26805
ENSG00000232810	TNF	1.68062	0.910789	0.655766	1.76965	1.47985	0.817979	0.925891	1.12827	1.524	0.450861
ENSG00000124491	F13A1	1.57608	1.38744	0.239684	0.796935	2.28962	0.722221	0.758443	0.778416	0.882934	0.516612
ENSG00000010610	CD4	1.06603	0.687008	0.408002	0.579589	1.10811	0.670304	0.374297	0.533521	0.71621	0.497826
ENSG00000172243	CLEC7A	0.967821	1.1066	0.982975	1.19956	0.902116	0.717606	0.827392	0.70626	0.826576	0.854757
ENSG00000112799	LY86	0.845853	1.61122	0.754063	1.26963	0.928161	0.963346	1.13274	0.715006	0.997997	0.591755
ENSG00000136634	IL10	0.619342	0.655678	0.857747	1.4941	0.473551	1.08564	1.12289	0.544454	0.589405	0.601148
ENSG00000136244	IL6	0.565486	0.130912	0.406656	0.339677	0.23204	0.318423	0.226548	0.260201	0.227778	0.272395
ENSG00000135838	NPL	0.538558	0.534837	0.146773	0.306422	0.440403	0.516861	0.581145	0.236149	0.321707	0.54479
ENSG00000017427	IGF1	0.346895	0.361406	0.00942579	0.203094	0.46408	0.101526	0.128049	0.179298	0.140894	0.0563576
ENSG00000181374	CCL13	0.239183	0.0783234	0.0121189	0.0973899	0.277028	0.14306	0.0886492	0.0830894	0.0704469	0.0939294
ENSG00000090659	CD209	0.224927	0.046994	0.00942579	0.0415689	0.203627	0.0646076	0.0787993	0.0502909	0.0587057	0.0751435
ENSG00000116701	NCF2	0.202751	0.223781	0.618063	0.226847	0.149169	0.428026	0.374297	0.159619	0.194903	0.263002
ENSG00000111729	CLEC4A	0.174239	0.28644	0.312398	0.321862	0.175214	0.248047	0.315197	0.179298	0.192555	0.356932
ENSG00000107562	CXCL12	0.15048	0.189095	0.00673271	0.125894	0.130227	0.0253816	0.187148	0.0655969	0.0281787	0.00939294
ENSG00000117154	IGSF21	0.123552	0.251754	0.00942579	0.162712	0.163375	0.186901	0.157599	0.115888	0.15968	0.22543
ENSG00000181631	P2RY13	0.112464	0.285321	0.0834856	0.224472	0.172846	0.0888355	0.0984991	0.122448	0.171421	0.0657506
ENSG00000134061	CD180	0.106128	0.129793	0.0579013	0.0771993	0.106549	0.131523	0.0984991	0.0481044	0.126804	0.0751435
M1 Markers
ENSG00000275302	CCL4	97.9115	47.4875	20.5078	78.5889	61.4978	36.0822	47.9986	46.0337	46.6147	13.4883
ENSG00000277632	CCL3	97.6375	51.7583	27.6984	93.0703	59.8948	41.5046	53.8002	45.2444	54.2535	14.2209
ENSG00000108691	CCL2	7.1359	4.00232	1.97538	4.71035	7.2406	4.47985	4.70826	3.52255	6.25098	1.11776
ENSG00000140968	IRF8	0.750814	0.744072	0.552082	1.09504	0.831083	0.601082	1.11304	0.760924	0.753781	0.695077
ENSG00000169245	CXCL10	0.472031	1.0059	0.693469	1.41928	0.617985	2.23242	1.60554	0.828707	1.54983	0.131501
ENSG00000101017	CD40	0.270863	0.267418	0.350101	0.633035	0.269924	0.494941	0.374297	0.244895	0.22543	0.187859
ENSG00000105246	EBI3	0.164736	0.269656	0.0525151	0.184091	0.260453	0.168441	0.315197	0.179298	0.0986256	0.0563576
ENSG00000121594	CD80	0.147312	0.0850368	0.137347	0.23041	0.0828715	0.158058	0.167448	0.0983953	0.0939291	0.131501
ENSG00000134321	RSAD2	0.12672	0.142101	0.0861787	0.117581	0.0615617	0.0657613	0.0886492	0.102768	0.082188	0.103322
ENSG00000126353	CCR7	0.0934557	0.0145458	0.32317	0.418064	0.0520907	0.224973	0.0492495	0.443872	0.0798398	0.0939294
ENSG00000138755	CXCL9	0.0633598	0.046994	0.0875252	0.103328	0.248615	0.380724	0.187148	0.0524775	0.138545	0.0751435
ENSG00000128284	APOL3	0.0443519	0.0995826	0.0754063	0.0546334	0.0568262	0.0807595	0.0492495	0.0634103	0.0798398	0.0187859
ENSG00000131203	IDO1	0.0348479	0.00895124	0.0659805	0.122331	0.0142065	0.204206	0.0492495	0.168365	0.0234823	0.00939294
ENSG00000160326	SLC2A6	0.0253439	0.00671343	0.146773	0.026129	0.00473552	0.0634539	0.00984991	0.0131194	0.0117411	0
ENSG00000078081	LAMP3	0.00950397	0.00783234	0.0457824	0.0285044	0.0189421	0.0403798	0	0.06997	0.0164376	0
ENSG00000172724	CCL19	0.00633598	0.00447562	0.00538617	0.0308797	0.068665	0.0634539	0.0787993	0.0809028	0.0164376	0

## Sheet: Figure 5I
Table S7-3. List of M1 and M2 Signature Genes of Cluster 6 Macrophage, Related to Figure 5I
Ensembl ID	Gene Symbol	Cluster 1 (Average Expression)	Cluster 1 (Log2 Fold Change)	Cluster 1 P-Value	Cluster 2 (Average Expression)	Cluster 2 (Log2 Fold Change)	Cluster 2 P-Value	Cluster 3 (Average Expression)	Cluster 3 (Log2 Fold Change)	Cluster 3 P-Value	Cluster 4 (Average Expression)	Cluster 4 (Log2 Fold Change)	Cluster 4 P-Value	Cluster 5 (Average Expression)	Cluster 5 (Log2 Fold Change)	Cluster 5 P-Value	Cluster 6 (Average Expression)	Cluster 6 (Log2 Fold Change)	Cluster 6 P-Value	Cluster 7 (Average Expression)	Cluster 7 (Log2 Fold Change)	Cluster 7 P-Value	Cluster 8 (Average Expression)	Cluster 8 (Log2 Fold Change)	Cluster 8 P-Value	Cluster 9 (Average Expression)	Cluster 9 (Log2 Fold Change)	Cluster 9 P-Value	Cluster 10 (Average Expression)	Cluster 10 (Log2 Fold Change)	Cluster 10 P-Value
ENSG00000164687	FABP5	0.418175	-1.62457	0.018559	0.488962	-1.44022	0.0064627	1.41656	0.291906	0.845326	0.501202	-1.39192	0.0251709	0.338589	-1.89246	0.105821	3.61572	2.29251	1.28085e-14	1.21154	0.0217166	1	0.505096	-1.30902	0.247885	1.41129	0.265424	1	1.27744	0.0992722	1
ENSG00000132507	EIF5A	0.392831	-0.980889	0.251174	0.528123	-0.547888	0.672999	0.851014	0.252448	0.829693	0.472697	-0.720966	0.644571	0.575365	-0.372496	1	1.33715	1.1089	0.00452544	0.728893	-0.00308091	1	0.640663	-0.208952	1	1.10836	0.659655	0.534032	0.309967	-1.22853	1
ENSG00000130203	APOE	31.04	0.84635	0.156075	20.5767	0.153199	1	6.48629	-1.67959	0.00010845	22.5778	0.313711	1	18.4827	-0.0318508	1	18.4051	-0.0401002	1	19.1285	0.0101474	1	13.9065	-0.473625	1	14.0612	-0.454414	0.977269	32.8941	0.813611	1
ENSG00000166927	MS4A7	4.89138	0.767598	0.225151	4.23394	0.553719	0.442749	1.32365	-1.35304	0.002532	3.9051	0.400164	0.961178	3.78131	0.309741	1	2.02245	-0.709111	0.307558	3.08302	-0.0185639	1	2.43364	-0.37991	1	2.19794	-0.533819	0.893587	1.66255	-0.918343	1
